# Supplementary material for: Integrative bioinformatics analysis to explore a robust diagnostic signature and landscape of immune cell infiltration in sarcoidosis
Source: Front Med (Lausanne). 2022 Nov 4;9:942177. doi: 10.3389/fmed.2022.942177 (PMC9672334; doi:10.3389/fmed.2022.942177)
Supplement: Supplementary file 1 [file Table_1.XLSX]

## Sheet: Sheet1
Table S1.The details of eleven datasets
ID	GEO accession	GEO platform	Sample size		Sample type	Source type
			Sarcoidosis	Control
1	GSE83456	GPL10558	49	61	RNA	Whole blood
2	GSE42826	GPL10558	25	52	RNA	Whole blood
3	GSE42830	GPL10558	25	38	RNA	Whole blood
4	GSE42834	GPL10558	61	113	RNA	Whole blood
5	GSE18781	GPL570	12	25	RNA	Whole blood
6	GSE34608	GPL6480	18	18	RNA	Whole blood
7	GSE19314	GPL570	37	20	RNA	Peripheral blood mononuclear cells
8	GSE37912	GPL5175	39	35	RNA	Peripheral blood mononuclear cells
9	GSE73394	GPL10739	26	20	RNA	Bronchoalveolar lavage cells
10	GSE75023	GPL571	15	12	RNA	Bronchoalveolar lavage cells
11	GSE16538	GPL570	6	6	RNA	Lung tissue
