# Supplementary material for: Integrative bioinformatics analysis to explore a robust diagnostic signature and landscape of immune cell infiltration in sarcoidosis
Source: Front Med (Lausanne). 2022 Nov 4;9:942177. doi: 10.3389/fmed.2022.942177 (PMC9672334; doi:10.3389/fmed.2022.942177)
Supplement: Supplementary file 2 [file Table_2.xlsx]

## Sheet: GSE83456_clin
Table S2 baseline characteristics
Dataset	ID	type	age	sex	tissue type
GSE83456	GSM2203587	normal	22	Female	whole blood
	GSM2203588	normal	27	Male	whole blood
	GSM2203589	normal	24	Female	whole blood
	GSM2203590	normal	21	Female	whole blood
	GSM2203591	normal	27	Female	whole blood
	GSM2203592	normal	33	Female	whole blood
	GSM2203593	normal	42	Male	whole blood
	GSM2203594	normal	29	Male	whole blood
	GSM2203595	normal	52	Female	whole blood
	GSM2203596	normal	22	Female	whole blood
	GSM2203597	normal	47	Female	whole blood
	GSM2203598	normal	49	Male	whole blood
	GSM2203599	normal	23	Male	whole blood
	GSM2203600	normal	49	Female	whole blood
	GSM2203601	normal	41	Female	whole blood
	GSM2203602	normal	35	Male	whole blood
	GSM2203603	normal	52	Female	whole blood
	GSM2203604	normal	28	Female	whole blood
	GSM2203605	normal	36	Female	whole blood
	GSM2203606	normal	25	Male	whole blood
	GSM2203607	normal	34	Male	whole blood
	GSM2203608	normal	46	Female	whole blood
	GSM2203609	normal	53	Female	whole blood
	GSM2203610	normal	23	Male	whole blood
	GSM2203611	normal	56	Male	whole blood
	GSM2203612	normal	23	Male	whole blood
	GSM2203613	normal	30	Male	whole blood
	GSM2203614	normal	43	Male	whole blood
	GSM2203615	normal	53	Male	whole blood
	GSM2203616	normal	64	Male	whole blood
	GSM2203617	normal	35	Male	whole blood
	GSM2203618	normal	35	Female	whole blood
	GSM2203619	normal	22	Female	whole blood
	GSM2203620	normal	51	Female	whole blood
	GSM2203621	normal	26	Male	whole blood
	GSM2203622	normal	38	Male	whole blood
	GSM2203623	normal	30	Male	whole blood
	GSM2203624	normal	34	Male	whole blood
	GSM2203625	normal	42	Male	whole blood
	GSM2203626	normal	34	Female	whole blood
	GSM2203627	normal	33	Female	whole blood
	GSM2203628	normal	23	Female	whole blood
	GSM2203629	normal	28	Male	whole blood
	GSM2203630	normal	24	Male	whole blood
	GSM2203631	normal	39	Male	whole blood
	GSM2203632	normal	29	Female	whole blood
	GSM2203633	normal	54	Male	whole blood
	GSM2203634	normal	32	Male	whole blood
	GSM2203635	normal	51	Female	whole blood
	GSM2203636	normal	21	Male	whole blood
	GSM2203637	normal	30	Male	whole blood
	GSM2203638	normal	29	Male	whole blood
	GSM2203639	normal	68	Female	whole blood
	GSM2203640	normal	20	Female	whole blood
	GSM2203641	normal	31	Male	whole blood
	GSM2203642	normal	32	Male	whole blood
	GSM2203643	normal	45	Male	whole blood
	GSM2203644	normal	34	Male	whole blood
	GSM2203645	normal	42	Female	whole blood
	GSM2203646	normal	34	Female	whole blood
	GSM2203647	normal	29	Female	whole blood
	GSM2203693	sarcoidosis	30	Male	whole blood
	GSM2203694	sarcoidosis	72	Female	whole blood
	GSM2203695	sarcoidosis	37	Male	whole blood
	GSM2203696	sarcoidosis	77	Female	whole blood
	GSM2203697	sarcoidosis	59	Female	whole blood
	GSM2203698	sarcoidosis	49	Female	whole blood
	GSM2203699	sarcoidosis	38	Female	whole blood
	GSM2203700	sarcoidosis	42	Female	whole blood
	GSM2203701	sarcoidosis	49	Male	whole blood
	GSM2203702	sarcoidosis	42	Male	whole blood
	GSM2203703	sarcoidosis	60	Female	whole blood
	GSM2203704	sarcoidosis	39	Male	whole blood
	GSM2203705	sarcoidosis	66	Male	whole blood
	GSM2203706	sarcoidosis	47	Male	whole blood
	GSM2203707	sarcoidosis	43	Female	whole blood
	GSM2203708	sarcoidosis	30	Male	whole blood
	GSM2203709	sarcoidosis	48	Male	whole blood
	GSM2203710	sarcoidosis	49	Female	whole blood
	GSM2203711	sarcoidosis	50	Male	whole blood
	GSM2203712	sarcoidosis	44	Male	whole blood
	GSM2203713	sarcoidosis	56	Male	whole blood
	GSM2203714	sarcoidosis	56	Male	whole blood
	GSM2203715	sarcoidosis	50	Male	whole blood
	GSM2203716	sarcoidosis	40	Male	whole blood
	GSM2203717	sarcoidosis	46	Male	whole blood
	GSM2203718	sarcoidosis	39	Female	whole blood
	GSM2203719	sarcoidosis	34	Female	whole blood
	GSM2203720	sarcoidosis	42	Male	whole blood
	GSM2203721	sarcoidosis	55	Male	whole blood
	GSM2203722	sarcoidosis	36	Male	whole blood
	GSM2203723	sarcoidosis	34	Male	whole blood
	GSM2203724	sarcoidosis	32	Male	whole blood
	GSM2203725	sarcoidosis	74	Male	whole blood
	GSM2203726	sarcoidosis	66	Female	whole blood
	GSM2203727	sarcoidosis	24	Male	whole blood
	GSM2203728	sarcoidosis	45	Male	whole blood
	GSM2203729	sarcoidosis	71	Female	whole blood
	GSM2203730	sarcoidosis	38	Male	whole blood
	GSM2203731	sarcoidosis	60	Male	whole blood
	GSM2203732	sarcoidosis	65	Female	whole blood
	GSM2203733	sarcoidosis	33	Female	whole blood
	GSM2203734	sarcoidosis	31	Male	whole blood
	GSM2203735	sarcoidosis	51	Female	whole blood
	GSM2203736	sarcoidosis	55	Male	whole blood
	GSM2203737	sarcoidosis	34	Male	whole blood
	GSM2203738	sarcoidosis	56	Female	whole blood
	GSM2203739	sarcoidosis	49	Female	whole blood
	GSM2203740	sarcoidosis	35	Female	whole blood
	GSM2203741	sarcoidosis	65	Female	whole blood
GSE42830	GSM1050928	normal		Female	whole blood
	GSM1050932	normal		Male	whole blood
	GSM1050935	normal		Female	whole blood
	GSM1050937	normal		Female	whole blood
	GSM1050938	normal		Female	whole blood
	GSM1050939	normal		Female	whole blood
	GSM1050940	normal		Female	whole blood
	GSM1050941	normal		Female	whole blood
	GSM1050947	normal		Male	whole blood
	GSM1050954	normal		Female	whole blood
	GSM1050956	normal		Female	whole blood
	GSM1050957	normal		Male	whole blood
	GSM1050959	normal		Female	whole blood
	GSM1050962	normal		Female	whole blood
	GSM1050964	normal		Male	whole blood
	GSM1050968	normal		Female	whole blood
	GSM1050972	normal		Male	whole blood
	GSM1050978	normal		Male	whole blood
	GSM1050981	normal		Female	whole blood
	GSM1050984	normal		Female	whole blood
	GSM1050987	normal		Male	whole blood
	GSM1050989	normal		Male	whole blood
	GSM1050991	normal		Female	whole blood
	GSM1050992	normal		Male	whole blood
	GSM1050995	normal		Female	whole blood
	GSM1050997	normal		Female	whole blood
	GSM1050998	normal		Male	whole blood
	GSM1050999	normal		Female	whole blood
	GSM1051000	normal		Male	whole blood
	GSM1051004	normal		Male	whole blood
	GSM1051010	normal		Female	whole blood
	GSM1051011	normal		Female	whole blood
	GSM1051012	normal		Male	whole blood
	GSM1051013	normal		Male	whole blood
	GSM1051015	normal		Female	whole blood
	GSM1051016	normal		Female	whole blood
	GSM1051017	normal		Male	whole blood
	GSM1051020	normal		Female	whole blood
	GSM1050930	sarcoidosis		Male	whole blood
	GSM1050944	sarcoidosis		Female	whole blood
	GSM1050946	sarcoidosis		Male	whole blood
	GSM1050950	sarcoidosis		Male	whole blood
	GSM1050951	sarcoidosis		Male	whole blood
	GSM1050952	sarcoidosis		Male	whole blood
	GSM1050970	sarcoidosis		Female	whole blood
	GSM1050982	sarcoidosis		Female	whole blood
	GSM1050983	sarcoidosis		Female	whole blood
	GSM1050985	sarcoidosis		Female	whole blood
	GSM1050986	sarcoidosis		Female	whole blood
	GSM1051003	sarcoidosis		Male	whole blood
	GSM1051006	sarcoidosis		Male	whole blood
	GSM1051007	sarcoidosis		Female	whole blood
	GSM1051009	sarcoidosis		Male	whole blood
	GSM1051021	sarcoidosis		None	whole blood
	GSM1051022	sarcoidosis		None	whole blood
	GSM1050931	sarcoidosis		Female	whole blood
	GSM1050933	sarcoidosis		Male	whole blood
	GSM1050949	sarcoidosis		Female	whole blood
	GSM1050969	sarcoidosis		Female	whole blood
	GSM1050973	sarcoidosis		Male	whole blood
	GSM1050975	sarcoidosis		Male	whole blood
	GSM1050976	sarcoidosis		Male	whole blood
	GSM1050977	sarcoidosis		Female	whole blood
GSE42834	GSM1050742	normal		Male	whole blood
	GSM1050743	normal		Female	whole blood
	GSM1050744	normal		Female	whole blood
	GSM1050745	normal		Female	whole blood
	GSM1050746	normal		Female	whole blood
	GSM1050747	normal		Female	whole blood
	GSM1050749	normal		Female	whole blood
	GSM1050750	normal		Female	whole blood
	GSM1050751	normal		Male	whole blood
	GSM1050752	normal		Male	whole blood
	GSM1050753	normal		Male	whole blood
	GSM1050755	normal		Male	whole blood
	GSM1050756	normal		Female	whole blood
	GSM1050757	normal		Male	whole blood
	GSM1050764	normal		Female	whole blood
	GSM1050765	normal		Female	whole blood
	GSM1050768	normal		Female	whole blood
	GSM1050769	normal		Male	whole blood
	GSM1050770	normal		Female	whole blood
	GSM1050771	normal		Male	whole blood
	GSM1050772	normal		Female	whole blood
	GSM1050773	normal		Female	whole blood
	GSM1050781	normal		Female	whole blood
	GSM1050782	normal		Female	whole blood
	GSM1050785	normal		Female	whole blood
	GSM1050786	normal		Female	whole blood
	GSM1050787	normal		Male	whole blood
	GSM1050788	normal		Female	whole blood
	GSM1050794	normal		Female	whole blood
	GSM1050796	normal		Male	whole blood
	GSM1050799	normal		Female	whole blood
	GSM1050800	normal		Female	whole blood
	GSM1050803	normal		Male	whole blood
	GSM1050804	normal		Female	whole blood
	GSM1050805	normal		Female	whole blood
	GSM1050806	normal		Male	whole blood
	GSM1050808	normal		Male	whole blood
	GSM1050809	normal		Male	whole blood
	GSM1050810	normal		Male	whole blood
	GSM1050812	normal		Female	whole blood
	GSM1050815	normal		Female	whole blood
	GSM1050819	normal		Female	whole blood
	GSM1050820	normal		Female	whole blood
	GSM1050821	normal		Female	whole blood
	GSM1050823	normal		Male	whole blood
	GSM1050824	normal		Female	whole blood
	GSM1050825	normal		Female	whole blood
	GSM1050827	normal		Male	whole blood
	GSM1050828	normal		Male	whole blood
	GSM1050829	normal		Female	whole blood
	GSM1050831	normal		Female	whole blood
	GSM1050832	normal		Female	whole blood
	GSM1050833	normal		Male	whole blood
	GSM1050835	normal		Female	whole blood
	GSM1050837	normal		Female	whole blood
	GSM1050838	normal		Male	whole blood
	GSM1050839	normal		Female	whole blood
	GSM1050841	normal		Female	whole blood
	GSM1050842	normal		Male	whole blood
	GSM1050844	normal		Male	whole blood
	GSM1050846	normal		Female	whole blood
	GSM1050847	normal		Male	whole blood
	GSM1050849	normal		Female	whole blood
	GSM1050850	normal		Male	whole blood
	GSM1050851	normal		Female	whole blood
	GSM1050852	normal		Female	whole blood
	GSM1050853	normal		Male	whole blood
	GSM1050854	normal		Female	whole blood
	GSM1050856	normal		Female	whole blood
	GSM1050858	normal		Female	whole blood
	GSM1050859	normal		Female	whole blood
	GSM1050860	normal		Female	whole blood
	GSM1050861	normal		Male	whole blood
	GSM1050862	normal		Female	whole blood
	GSM1050928	normal		Female	whole blood
	GSM1050932	normal		Male	whole blood
	GSM1050935	normal		Female	whole blood
	GSM1050937	normal		Female	whole blood
	GSM1050938	normal		Female	whole blood
	GSM1050939	normal		Female	whole blood
	GSM1050940	normal		Female	whole blood
	GSM1050941	normal		Female	whole blood
	GSM1050947	normal		Male	whole blood
	GSM1050954	normal		Female	whole blood
	GSM1050956	normal		Female	whole blood
	GSM1050957	normal		Male	whole blood
	GSM1050959	normal		Female	whole blood
	GSM1050962	normal		Female	whole blood
	GSM1050964	normal		Male	whole blood
	GSM1050968	normal		Female	whole blood
	GSM1050972	normal		Male	whole blood
	GSM1050978	normal		Male	whole blood
	GSM1050981	normal		Female	whole blood
	GSM1050984	normal		Female	whole blood
	GSM1050987	normal		Male	whole blood
	GSM1050989	normal		Male	whole blood
	GSM1050991	normal		Female	whole blood
	GSM1050992	normal		Male	whole blood
	GSM1050995	normal		Female	whole blood
	GSM1050997	normal		Female	whole blood
	GSM1050998	normal		Male	whole blood
	GSM1050999	normal		Female	whole blood
	GSM1051000	normal		Male	whole blood
	GSM1051004	normal		Male	whole blood
	GSM1051010	normal		Female	whole blood
	GSM1051011	normal		Female	whole blood
	GSM1051012	normal		Male	whole blood
	GSM1051013	normal		Male	whole blood
	GSM1051015	normal		Female	whole blood
	GSM1051016	normal		Female	whole blood
	GSM1051017	normal		Male	whole blood
	GSM1051020	normal		Female	whole blood
	GSM1050775	sarcoidosis		Male	whole blood
	GSM1050778	sarcoidosis		Female	whole blood
	GSM1050779	sarcoidosis		Male	whole blood
	GSM1050784	sarcoidosis		Male	whole blood
	GSM1050790	sarcoidosis		Female	whole blood
	GSM1050791	sarcoidosis		Female	whole blood
	GSM1050792	sarcoidosis		Male	whole blood
	GSM1050798	sarcoidosis		Male	whole blood
	GSM1050802	sarcoidosis		Female	whole blood
	GSM1050807	sarcoidosis		Female	whole blood
	GSM1050813	sarcoidosis		Female	whole blood
	GSM1050822	sarcoidosis		Female	whole blood
	GSM1050826	sarcoidosis		Male	whole blood
	GSM1050836	sarcoidosis		Female	whole blood
	GSM1050845	sarcoidosis		Male	whole blood
	GSM1050848	sarcoidosis		Female	whole blood
	GSM1050930	sarcoidosis		Male	whole blood
	GSM1050944	sarcoidosis		Female	whole blood
	GSM1050946	sarcoidosis		Male	whole blood
	GSM1050950	sarcoidosis		Male	whole blood
	GSM1050951	sarcoidosis		Male	whole blood
	GSM1050952	sarcoidosis		Male	whole blood
	GSM1050970	sarcoidosis		Female	whole blood
	GSM1050982	sarcoidosis		Female	whole blood
	GSM1050983	sarcoidosis		Female	whole blood
	GSM1050985	sarcoidosis		Female	whole blood
	GSM1050986	sarcoidosis		Female	whole blood
	GSM1051003	sarcoidosis		Male	whole blood
	GSM1051006	sarcoidosis		Male	whole blood
	GSM1051007	sarcoidosis		Female	whole blood
	GSM1051009	sarcoidosis		Male	whole blood
	GSM1051021	sarcoidosis		None	whole blood
	GSM1051022	sarcoidosis		None	whole blood
	GSM1050733	sarcoidosis		Female	whole blood
	GSM1050748	sarcoidosis		Female	whole blood
	GSM1050758	sarcoidosis		Female	whole blood
	GSM1050760	sarcoidosis		Female	whole blood
	GSM1050761	sarcoidosis		Female	whole blood
	GSM1050767	sarcoidosis		Female	whole blood
	GSM1050754	sarcoidosis		Female	whole blood
	GSM1050759	sarcoidosis		Female	whole blood
	GSM1050762	sarcoidosis		Male	whole blood
	GSM1050763	sarcoidosis		Male	whole blood
	GSM1050766	sarcoidosis		None	whole blood
	GSM1050774	sarcoidosis		Male	whole blood
	GSM1050780	sarcoidosis		Female	whole blood
	GSM1050783	sarcoidosis		Male	whole blood
	GSM1050789	sarcoidosis		Male	whole blood
	GSM1050793	sarcoidosis		Female	whole blood
	GSM1050797	sarcoidosis		Male	whole blood
	GSM1050816	sarcoidosis		Male	whole blood
	GSM1050843	sarcoidosis		Male	whole blood
	GSM1050864	sarcoidosis		Female	whole blood
	GSM1050931	sarcoidosis		Female	whole blood
	GSM1050933	sarcoidosis		Male	whole blood
	GSM1050949	sarcoidosis		Female	whole blood
	GSM1050969	sarcoidosis		Female	whole blood
	GSM1050973	sarcoidosis		Male	whole blood
	GSM1050975	sarcoidosis		Male	whole blood
	GSM1050976	sarcoidosis		Male	whole blood
	GSM1050977	sarcoidosis		Female	whole blood
GSE42826	GSM1050781	normal		Female	whole blood
	GSM1050782	normal		Female	whole blood
	GSM1050785	normal		Female	whole blood
	GSM1050786	normal		Female	whole blood
	GSM1050787	normal		Male	whole blood
	GSM1050788	normal		Female	whole blood
	GSM1050794	normal		Female	whole blood
	GSM1050796	normal		Male	whole blood
	GSM1050799	normal		Female	whole blood
	GSM1050800	normal		Female	whole blood
	GSM1050803	normal		Male	whole blood
	GSM1050804	normal		Female	whole blood
	GSM1050805	normal		Female	whole blood
	GSM1050806	normal		Male	whole blood
	GSM1050808	normal		Male	whole blood
	GSM1050809	normal		Male	whole blood
	GSM1050810	normal		Male	whole blood
	GSM1050812	normal		Female	whole blood
	GSM1050815	normal		Female	whole blood
	GSM1050819	normal		Female	whole blood
	GSM1050820	normal		Female	whole blood
	GSM1050821	normal		Female	whole blood
	GSM1050823	normal		Male	whole blood
	GSM1050824	normal		Female	whole blood
	GSM1050825	normal		Female	whole blood
	GSM1050827	normal		Male	whole blood
	GSM1050828	normal		Male	whole blood
	GSM1050829	normal		Female	whole blood
	GSM1050831	normal		Female	whole blood
	GSM1050832	normal		Female	whole blood
	GSM1050833	normal		Male	whole blood
	GSM1050835	normal		Female	whole blood
	GSM1050837	normal		Female	whole blood
	GSM1050838	normal		Male	whole blood
	GSM1050839	normal		Female	whole blood
	GSM1050841	normal		Female	whole blood
	GSM1050842	normal		Male	whole blood
	GSM1050844	normal		Male	whole blood
	GSM1050846	normal		Female	whole blood
	GSM1050847	normal		Male	whole blood
	GSM1050849	normal		Female	whole blood
	GSM1050850	normal		Male	whole blood
	GSM1050851	normal		Female	whole blood
	GSM1050852	normal		Female	whole blood
	GSM1050853	normal		Male	whole blood
	GSM1050854	normal		Female	whole blood
	GSM1050856	normal		Female	whole blood
	GSM1050858	normal		Female	whole blood
	GSM1050859	normal		Female	whole blood
	GSM1050860	normal		Female	whole blood
	GSM1050861	normal		Male	whole blood
	GSM1050862	normal		Female	whole blood
	GSM1050775	sarcoidosis		Male	whole blood
	GSM1050778	sarcoidosis		Female	whole blood
	GSM1050779	sarcoidosis		Male	whole blood
	GSM1050784	sarcoidosis		Male	whole blood
	GSM1050790	sarcoidosis		Female	whole blood
	GSM1050791	sarcoidosis		Female	whole blood
	GSM1050792	sarcoidosis		Male	whole blood
	GSM1050798	sarcoidosis		Male	whole blood
	GSM1050802	sarcoidosis		Female	whole blood
	GSM1050807	sarcoidosis		Female	whole blood
	GSM1050813	sarcoidosis		Female	whole blood
	GSM1050822	sarcoidosis		Female	whole blood
	GSM1050826	sarcoidosis		Male	whole blood
	GSM1050836	sarcoidosis		Female	whole blood
	GSM1050845	sarcoidosis		Male	whole blood
	GSM1050848	sarcoidosis		Female	whole blood
	GSM1050774	sarcoidosis		Male	whole blood
	GSM1050780	sarcoidosis		Female	whole blood
	GSM1050783	sarcoidosis		Male	whole blood
	GSM1050789	sarcoidosis		Male	whole blood
	GSM1050793	sarcoidosis		Female	whole blood
	GSM1050797	sarcoidosis		Male	whole blood
	GSM1050816	sarcoidosis		Male	whole blood
	GSM1050843	sarcoidosis		Male	whole blood
	GSM1050864	sarcoidosis		Female	whole blood
GSE34608	GSM851876	normal			whole blood
	GSM851877	normal			whole blood
	GSM851878	normal			whole blood
	GSM851879	normal			whole blood
	GSM851880	normal			whole blood
	GSM851881	normal			whole blood
	GSM851882	normal			whole blood
	GSM851883	normal			whole blood
	GSM851884	normal			whole blood
	GSM851885	normal			whole blood
	GSM851886	normal			whole blood
	GSM851887	normal			whole blood
	GSM851888	normal			whole blood
	GSM851889	normal			whole blood
	GSM851890	normal			whole blood
	GSM851891	normal			whole blood
	GSM851892	normal			whole blood
	GSM851893	normal			whole blood
	GSM851850	sarcoidosis			whole blood
	GSM851851	sarcoidosis			whole blood
	GSM851852	sarcoidosis			whole blood
	GSM851853	sarcoidosis			whole blood
	GSM851854	sarcoidosis			whole blood
	GSM851855	sarcoidosis			whole blood
	GSM851856	sarcoidosis			whole blood
	GSM851857	sarcoidosis			whole blood
	GSM851858	sarcoidosis			whole blood
	GSM851859	sarcoidosis			whole blood
	GSM851860	sarcoidosis			whole blood
	GSM851861	sarcoidosis			whole blood
	GSM851862	sarcoidosis			whole blood
	GSM851863	sarcoidosis			whole blood
	GSM851864	sarcoidosis			whole blood
	GSM851865	sarcoidosis			whole blood
	GSM851866	sarcoidosis			whole blood
	GSM851867	sarcoidosis			whole blood
GSE18781	GSM465925	normal	68	Female	whole blood
	GSM465926	normal	69	Female	whole blood
	GSM465927	normal	59	Female	whole blood
	GSM465928	normal	57	Male	whole blood
	GSM465929	normal	83	Female	whole blood
	GSM465930	normal	70	Male	whole blood
	GSM465931	normal	32	Male	whole blood
	GSM465932	normal	22	Female	whole blood
	GSM465933	normal	36	Female	whole blood
	GSM465934	normal	41	Male	whole blood
	GSM465935	normal	25	Female	whole blood
	GSM465936	normal	23	Female	whole blood
	GSM465937	normal	34	Female	whole blood
	GSM465938	normal	49	Female	whole blood
	GSM465939	normal	24	Female	whole blood
	GSM465940	normal	25	Female	whole blood
	GSM465941	normal	24	Female	whole blood
	GSM465942	normal	47	Female	whole blood
	GSM465943	normal	32	Female	whole blood
	GSM465944	normal	27	Female	whole blood
	GSM465945	normal	29	Female	whole blood
	GSM465946	normal	33	Female	whole blood
	GSM465947	normal	45	Male	whole blood
	GSM465948	normal	45	Female	whole blood
	GSM465949	normal	45	Female	whole blood
	GSM465950	sarcoidosis	49	Male	whole blood
	GSM465951	sarcoidosis	45	Male	whole blood
	GSM465952	sarcoidosis	48	Female	whole blood
	GSM465953	sarcoidosis	41	Female	whole blood
	GSM465954	sarcoidosis	68	Female	whole blood
	GSM465955	sarcoidosis	59	Female	whole blood
	GSM465956	sarcoidosis	63	Female	whole blood
	GSM465957	sarcoidosis	28	Male	whole blood
	GSM465958	sarcoidosis	57	Female	whole blood
	GSM465959	sarcoidosis	59	Female	whole blood
	GSM465960	sarcoidosis	70	Female	whole blood
	GSM465961	sarcoidosis	60	Female	whole blood
GSE19314	GSM479919	normal	39	Female	PBMC
	GSM479921	normal	66	Female	PBMC
	GSM479922	normal	43	Female	PBMC
	GSM479923	normal	48	Male	PBMC
	GSM479925	normal	34	Female	PBMC
	GSM479928	normal	55	Female	PBMC
	GSM479936	normal	61	Female	PBMC
	GSM479937	normal	56	Female	PBMC
	GSM479939	normal	45	Male	PBMC
	GSM479940	normal	59	Male	PBMC
	GSM479941	normal	34	Female	PBMC
	GSM479947	normal	53	Female	PBMC
	GSM479948	normal	55	Male	PBMC
	GSM479954	normal	70	Female	PBMC
	GSM479958	normal	42	Male	PBMC
	GSM479966	normal	55	Female	PBMC
	GSM479967	normal	43	Female	PBMC
	GSM479970	normal	60	Female	PBMC
	GSM479975	normal	57	Female	PBMC
	GSM479976	normal	62	Female	PBMC
	GSM479917	sarcoidosis	31	Male	PBMC
	GSM479920	sarcoidosis	66	Female	PBMC
	GSM479924	sarcoidosis	53	Female	PBMC
	GSM479926	sarcoidosis	63	Female	PBMC
	GSM479927	sarcoidosis	57	Female	PBMC
	GSM479931	sarcoidosis	43	Male	PBMC
	GSM479932	sarcoidosis	46	Female	PBMC
	GSM479933	sarcoidosis	66	Male	PBMC
	GSM479934	sarcoidosis	31	Female	PBMC
	GSM479935	sarcoidosis	37	Female	PBMC
	GSM479942	sarcoidosis	60	Male	PBMC
	GSM479943	sarcoidosis	47	Female	PBMC
	GSM479944	sarcoidosis	32	Male	PBMC
	GSM479945	sarcoidosis	73	Female	PBMC
	GSM479946	sarcoidosis	63	Male	PBMC
	GSM479949	sarcoidosis	37	Female	PBMC
	GSM479951	sarcoidosis	35	Male	PBMC
	GSM479952	sarcoidosis	62	Female	PBMC
	GSM479953	sarcoidosis	53	Female	PBMC
	GSM479956	sarcoidosis	40	Male	PBMC
	GSM479957	sarcoidosis	41	Female	PBMC
	GSM479959	sarcoidosis	44	Male	PBMC
	GSM479960	sarcoidosis	56	Male	PBMC
	GSM479961	sarcoidosis	40	Male	PBMC
	GSM479962	sarcoidosis	56	Female	PBMC
	GSM479963	sarcoidosis	57	Female	PBMC
	GSM479964	sarcoidosis	53	Female	PBMC
	GSM479965	sarcoidosis	60	Female	PBMC
	GSM479968	sarcoidosis	47	Female	PBMC
	GSM479969	sarcoidosis	53	Female	PBMC
	GSM479971	sarcoidosis	51	Male	PBMC
	GSM479972	sarcoidosis	54	Male	PBMC
	GSM479973	sarcoidosis	35	Female	PBMC
	GSM479974	sarcoidosis	67	Male	PBMC
	GSM479977	sarcoidosis	58	Female	PBMC
	GSM479979	sarcoidosis	63	Male	PBMC
	GSM479980	sarcoidosis	51	Male	PBMC
	GSM479981	sarcoidosis	50	Male	PBMC
GSE37912	GSM929799	normal			PBMC
	GSM929800	normal			PBMC
	GSM929801	normal			PBMC
	GSM929802	normal			PBMC
	GSM929803	normal			PBMC
	GSM929804	normal			PBMC
	GSM929805	normal			PBMC
	GSM929806	normal			PBMC
	GSM929836	normal			PBMC
	GSM929837	normal			PBMC
	GSM929838	normal			PBMC
	GSM929839	normal			PBMC
	GSM929840	normal			PBMC
	GSM929841	normal			PBMC
	GSM929842	normal			PBMC
	GSM929843	normal			PBMC
	GSM929844	normal			PBMC
	GSM929845	normal			PBMC
	GSM929846	normal			PBMC
	GSM929847	normal			PBMC
	GSM929848	normal			PBMC
	GSM929849	normal			PBMC
	GSM929850	normal			PBMC
	GSM929851	normal			PBMC
	GSM929852	normal			PBMC
	GSM929853	normal			PBMC
	GSM929854	normal			PBMC
	GSM929855	normal			PBMC
	GSM929856	normal			PBMC
	GSM929857	normal			PBMC
	GSM929858	normal			PBMC
	GSM929859	normal			PBMC
	GSM929860	normal			PBMC
	GSM929861	normal			PBMC
	GSM929862	normal			PBMC
	GSM929809	sarcoidosis			PBMC
	GSM929810	sarcoidosis			PBMC
	GSM929812	sarcoidosis			PBMC
	GSM929815	sarcoidosis			PBMC
	GSM929818	sarcoidosis			PBMC
	GSM929819	sarcoidosis			PBMC
	GSM929820	sarcoidosis			PBMC
	GSM929821	sarcoidosis			PBMC
	GSM929822	sarcoidosis			PBMC
	GSM929823	sarcoidosis			PBMC
	GSM929825	sarcoidosis			PBMC
	GSM929829	sarcoidosis			PBMC
	GSM929830	sarcoidosis			PBMC
	GSM929831	sarcoidosis			PBMC
	GSM929832	sarcoidosis			PBMC
	GSM929833	sarcoidosis			PBMC
	GSM929834	sarcoidosis			PBMC
	GSM929835	sarcoidosis			PBMC
	GSM929865	sarcoidosis			PBMC
	GSM929869	sarcoidosis			PBMC
	GSM929871	sarcoidosis			PBMC
	GSM929872	sarcoidosis			PBMC
	GSM929807	sarcoidosis			PBMC
	GSM929808	sarcoidosis			PBMC
	GSM929811	sarcoidosis			PBMC
	GSM929813	sarcoidosis			PBMC
	GSM929814	sarcoidosis			PBMC
	GSM929816	sarcoidosis			PBMC
	GSM929817	sarcoidosis			PBMC
	GSM929824	sarcoidosis			PBMC
	GSM929826	sarcoidosis			PBMC
	GSM929827	sarcoidosis			PBMC
	GSM929828	sarcoidosis			PBMC
	GSM929863	sarcoidosis			PBMC
	GSM929864	sarcoidosis			PBMC
	GSM929866	sarcoidosis			PBMC
	GSM929867	sarcoidosis			PBMC
	GSM929868	sarcoidosis			PBMC
	GSM929870	sarcoidosis			PBMC
GSE16538	GSM415386	normal			lung tissue
	GSM415387	normal			lung tissue
	GSM415388	normal			lung tissue
	GSM415389	normal			lung tissue
	GSM415390	normal			lung tissue
	GSM415391	normal			lung tissue
	GSM415392	sarcoidosis			lung tissue
	GSM415393	sarcoidosis			lung tissue
	GSM415394	sarcoidosis			lung tissue
	GSM415395	sarcoidosis			lung tissue
	GSM415396	sarcoidosis			lung tissue
	GSM415397	sarcoidosis			lung tissue
GSE75023	GSM1940915	normal			BAL cells
	GSM1940916	normal			BAL cells
	GSM1940917	normal			BAL cells
	GSM1940918	normal			BAL cells
	GSM1940919	normal			BAL cells
	GSM1940920	normal			BAL cells
	GSM1940921	normal			BAL cells
	GSM1940922	normal			BAL cells
	GSM1940923	normal			BAL cells
	GSM1940924	normal			BAL cells
	GSM1940925	normal			BAL cells
	GSM1940926	normal			BAL cells
	GSM1940927	sarcoidosis			BAL cells
	GSM1940928	sarcoidosis			BAL cells
	GSM1940929	sarcoidosis			BAL cells
	GSM1940930	sarcoidosis			BAL cells
	GSM1940931	sarcoidosis			BAL cells
	GSM1940932	sarcoidosis			BAL cells
	GSM1940933	sarcoidosis			BAL cells
	GSM1940934	sarcoidosis			BAL cells
	GSM1940935	sarcoidosis			BAL cells
	GSM1940936	sarcoidosis			BAL cells
	GSM1940937	sarcoidosis			BAL cells
	GSM1940938	sarcoidosis			BAL cells
	GSM1940939	sarcoidosis			BAL cells
	GSM1940940	sarcoidosis			BAL cells
	GSM1940941	sarcoidosis			BAL cells
GSE73394	GSM1892508	normal			BAL cells
	GSM1892509	normal			BAL cells
	GSM1892510	normal			BAL cells
	GSM1892511	normal			BAL cells
	GSM1892512	normal			BAL cells
	GSM1892513	normal			BAL cells
	GSM1892514	normal			BAL cells
	GSM1892515	normal			BAL cells
	GSM1892516	normal			BAL cells
	GSM1892517	normal			BAL cells
	GSM1892518	normal			BAL cells
	GSM1892519	normal			BAL cells
	GSM1892520	normal			BAL cells
	GSM1892521	normal			BAL cells
	GSM1892522	normal			BAL cells
	GSM1892523	normal			BAL cells
	GSM1892524	normal			BAL cells
	GSM1892525	normal			BAL cells
	GSM1892526	normal			BAL cells
	GSM1892527	normal			BAL cells
	GSM1892482	sarcoidosis			BAL cells
	GSM1892483	sarcoidosis			BAL cells
	GSM1892484	sarcoidosis			BAL cells
	GSM1892485	sarcoidosis			BAL cells
	GSM1892486	sarcoidosis			BAL cells
	GSM1892487	sarcoidosis			BAL cells
	GSM1892488	sarcoidosis			BAL cells
	GSM1892489	sarcoidosis			BAL cells
	GSM1892490	sarcoidosis			BAL cells
	GSM1892491	sarcoidosis			BAL cells
	GSM1892492	sarcoidosis			BAL cells
	GSM1892493	sarcoidosis			BAL cells
	GSM1892494	sarcoidosis			BAL cells
	GSM1892495	sarcoidosis			BAL cells
	GSM1892496	sarcoidosis			BAL cells
	GSM1892497	sarcoidosis			BAL cells
	GSM1892498	sarcoidosis			BAL cells
	GSM1892499	sarcoidosis			BAL cells
	GSM1892500	sarcoidosis			BAL cells
	GSM1892501	sarcoidosis			BAL cells
	GSM1892502	sarcoidosis			BAL cells
	GSM1892503	sarcoidosis			BAL cells
	GSM1892504	sarcoidosis			BAL cells
	GSM1892505	sarcoidosis			BAL cells
	GSM1892506	sarcoidosis			BAL cells
	GSM1892507	sarcoidosis			BAL cells
